# Supplementary figures and images for: Simvastatin reduces chronic kidney disease and renal failure risk in type 2 diabetes patients: post hoc ACCORD trial analysis
Source: PubMed Central journal article supplement — Diabetol Metab Syndr. 2024 Nov 14;16:272. doi: 10.1186/s13098-024-01514-6 (PMC11566239; doi:10.1186/s13098-024-01514-6), 2024-11-14

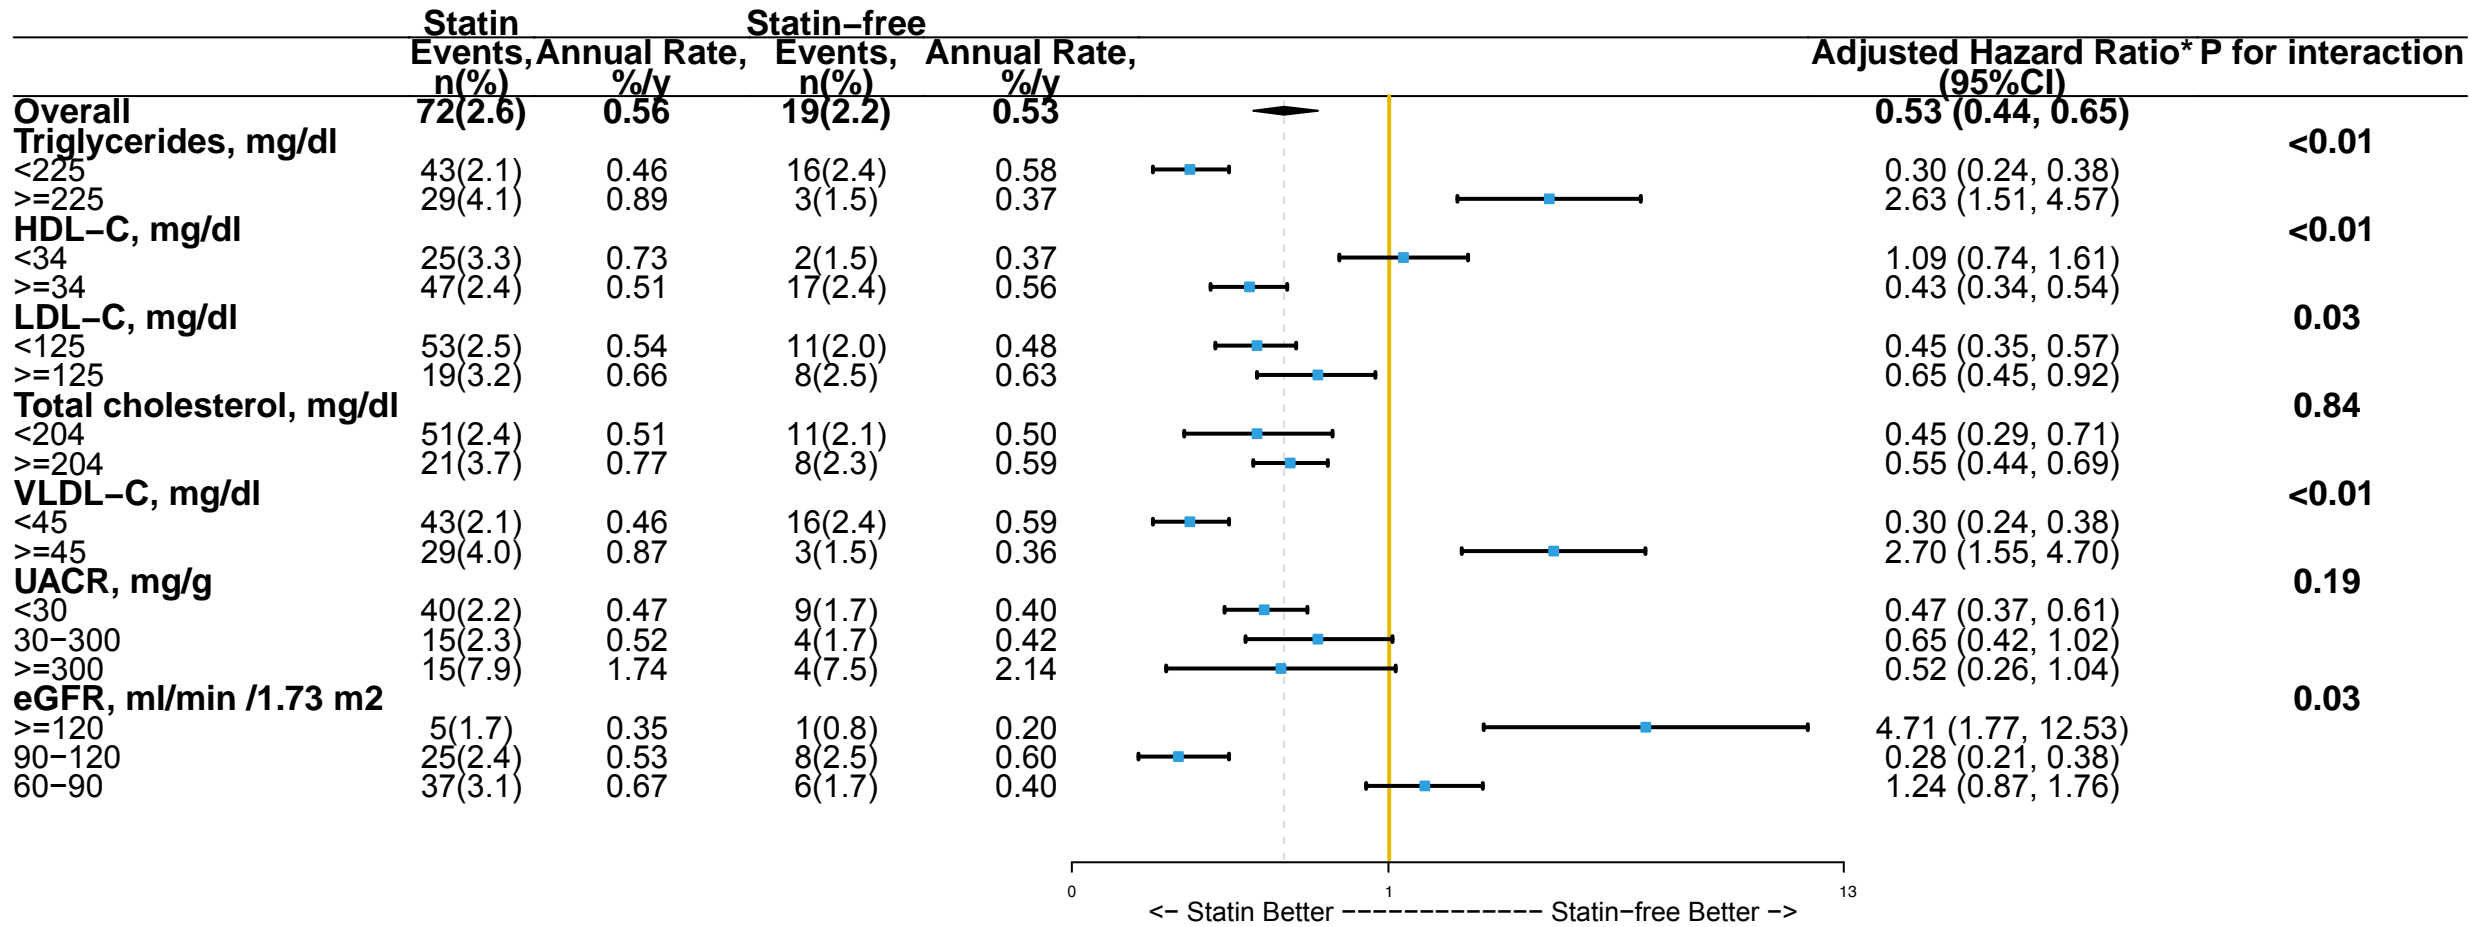

Supplement: 13098_2024_1514_MOESM1_ESM.pdf [file 13098_2024_1514_MOESM1_ESM.pdf]

# Mediation Effect Results

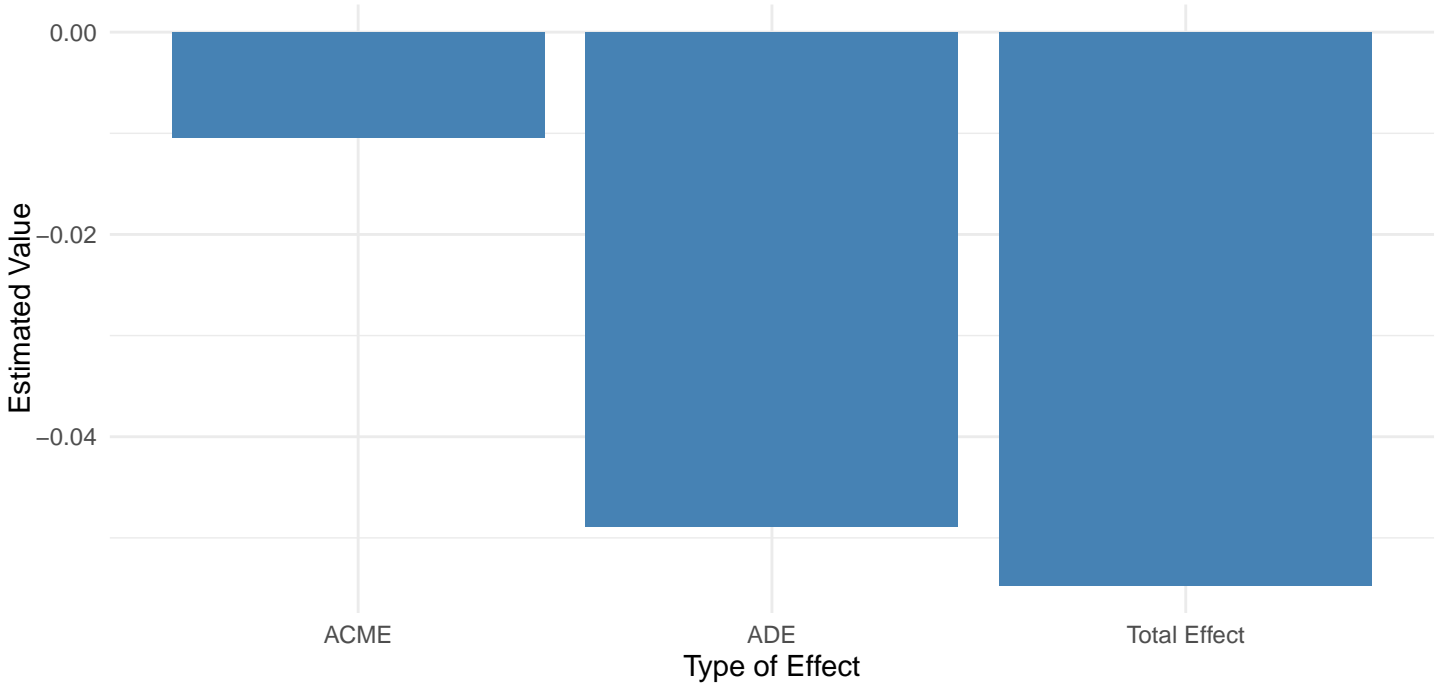

Supplement: 13098_2024_1514_MOESM2_ESM.pdf [file 13098_2024_1514_MOESM2_ESM.pdf]
